# Supplementary material
Source: MDPI journal article supplement (https://www.mdpi.com/2073-4344/11/10/1230)
Supplement: s1 [file s1]

# SUPPORTING INFORMATION

## **Al<sub>2</sub>O<sub>3</sub>-supported transition metals for plasma-catalytic NH<sub>3</sub> synthesis in a DBD plasma: Metal activity and insights into mechanisms**

**Yury Gorbanev <sup>1,\*</sup>, Yannick Engelmann <sup>1</sup>, Kevin van 't Veer <sup>1,2</sup>, Evgenii Vlasov <sup>3</sup>, Callie Ndayirinde <sup>1</sup>, Yanhui Yi <sup>4</sup>, Sara Bals <sup>3</sup> and Annemie Bogaerts <sup>1</sup>**

<sup>1</sup> Research group PLASMANT, Department of Chemistry, University of Antwerp, Universiteitsplein 1, 2610 Antwerp, Belgium; yury.gorbanev@uantwerpen.be; yannick.engelmann@uantwerpen.be; kevin.vantveer@uantwerpen.be; callie.ndayirinde@uantwerpen.be; annemie.bogaerts@uantwerpen.be

<sup>2</sup> Chemistry of Surfaces, Interfaces and Nanomaterials (ChemSIN), Faculty of Sciences, Université Libre de Bruxelles, Avenue F. D. Roosevelt 50, 1050 Brussels, Belgium

<sup>3</sup> Research group EMAT, Department of Physics, University of Antwerp, Groenenborgerlaan 171, 2020 Antwerp, Belgium; evgenii.vlasov@uantwerpen.be; sara.bals@uantwerpen.be

<sup>4</sup> State Key Laboratory of Fine Chemicals, School of Chemical Engineering, Dalian University of Technology, Dalian 116024, Liaoning, P. R. China; yiyanhui@dlut.edu.cn

\* Correspondence: yury.gorbanev@uantwerpen.be; Tel.: +32 32652343

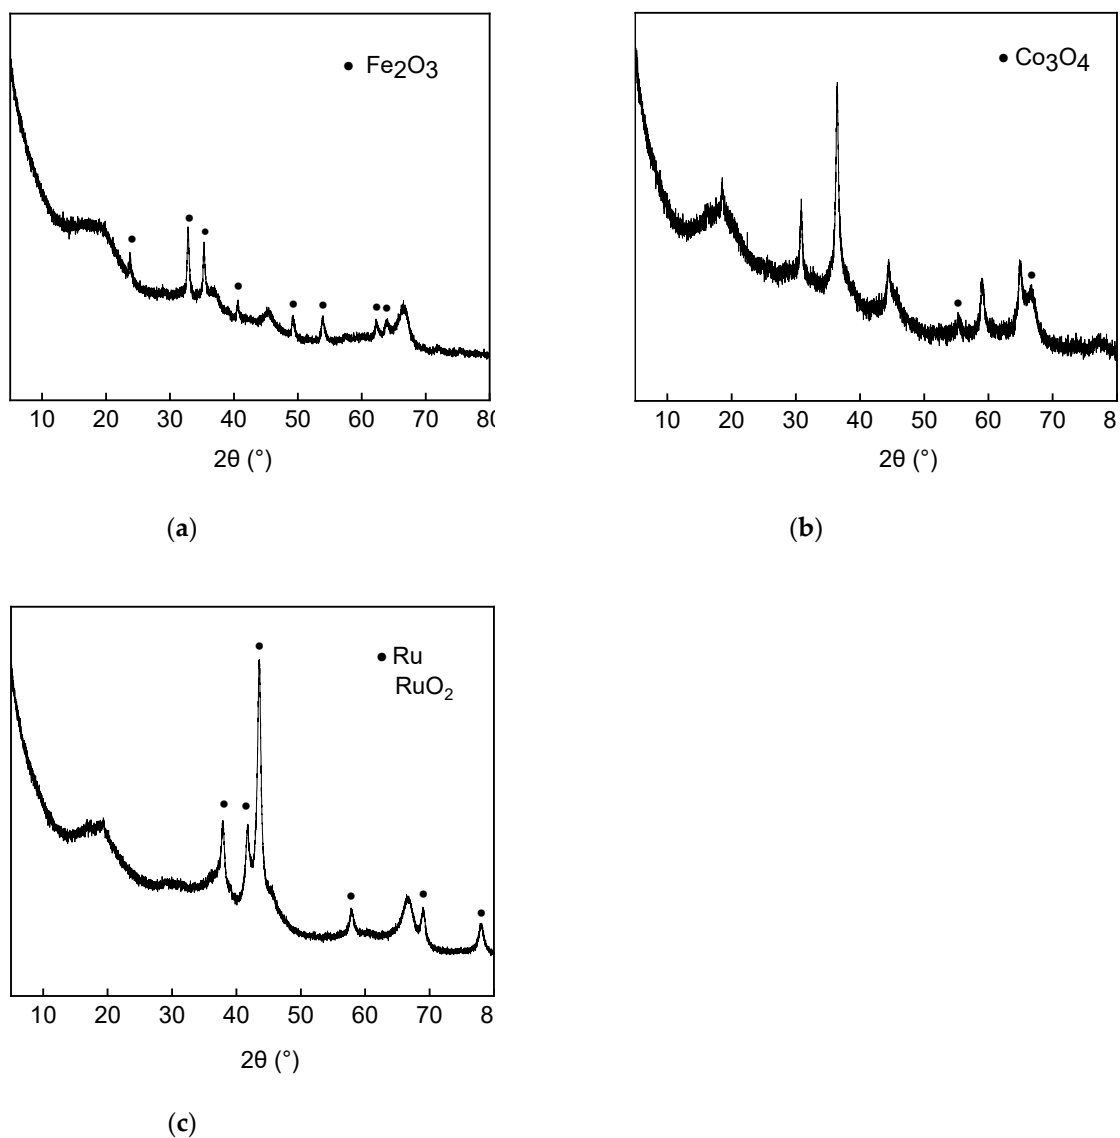

**Figure S1.** XRPD diffractograms of the catalysts used in our work. (a) Fe<sub>2</sub>O<sub>3</sub>/Al<sub>2</sub>O<sub>3</sub> (after calcination, before reduction); (b) Co<sub>3</sub>O<sub>4</sub>/Al<sub>2</sub>O<sub>3</sub> (after calcination, before reduction); (c) Ru/Al<sub>2</sub>O<sub>3</sub> (after calcination, after reduction).

**Table S1.** Measured active surface area ( $S_{\text{BET}}$ ) and pore volume ( $V$ ) for the 10 wt% Co/Al<sub>2</sub>O<sub>3</sub> catalyst before (fresh) and after (spent) the plasma-catalytic NH<sub>3</sub> synthesis experiments, showing no difference before and after the plasma experiments. The other catalysts showed similar behaviour.

| Material                                         | $S_{\text{BET}}$ (m <sup>2</sup> /g) | $V$ (cm <sup>3</sup> /g) |
|--------------------------------------------------|--------------------------------------|--------------------------|
| 10 wt% Co/Al <sub>2</sub> O <sub>3</sub> (fresh) | 175                                  | 0.37                     |
| 10 wt% Co/Al <sub>2</sub> O <sub>3</sub> (spent) | 177                                  | 0.37                     |

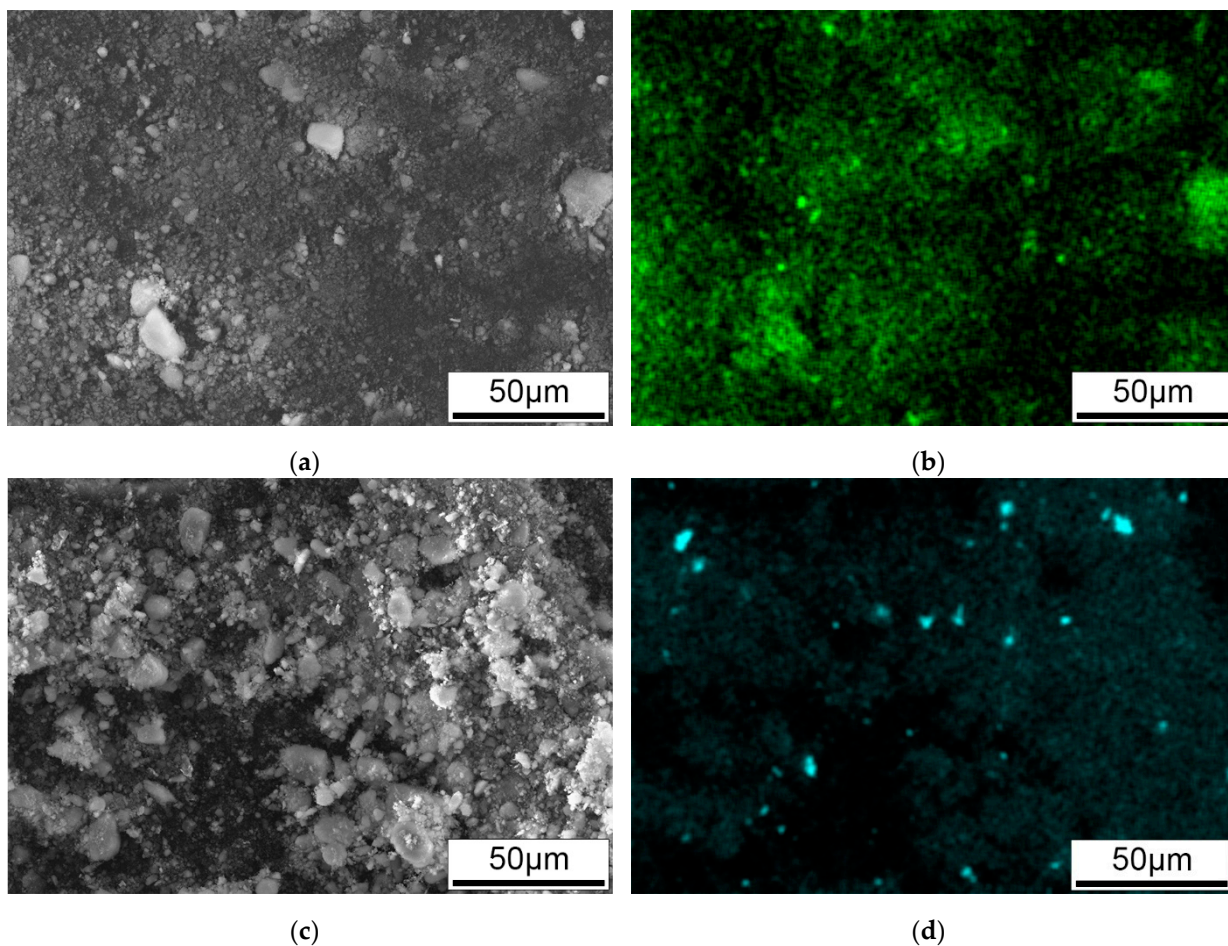

**Figure S2.** Typical SEM-EDX images of the catalysts, for the example of 10 wt% Co and Cu/Al<sub>2</sub>O<sub>3</sub> catalysts with EDX maps applied for visualisation of the respective metals. (a) SEM image of the 10 wt% Co/Al<sub>2</sub>O<sub>3</sub>; (b) SEM EDX map of Co on the surface of the 10 wt% Co/Al<sub>2</sub>O<sub>3</sub>; (c) SEM image of the 10 wt% Cu/Al<sub>2</sub>O<sub>3</sub>; (d) SEM EDX map of Cu on the surface of the 10 wt% Cu/Al<sub>2</sub>O<sub>3</sub>. Green and cyan colours indicate the particles of the respective metal on the surface of Al<sub>2</sub>O<sub>3</sub>.

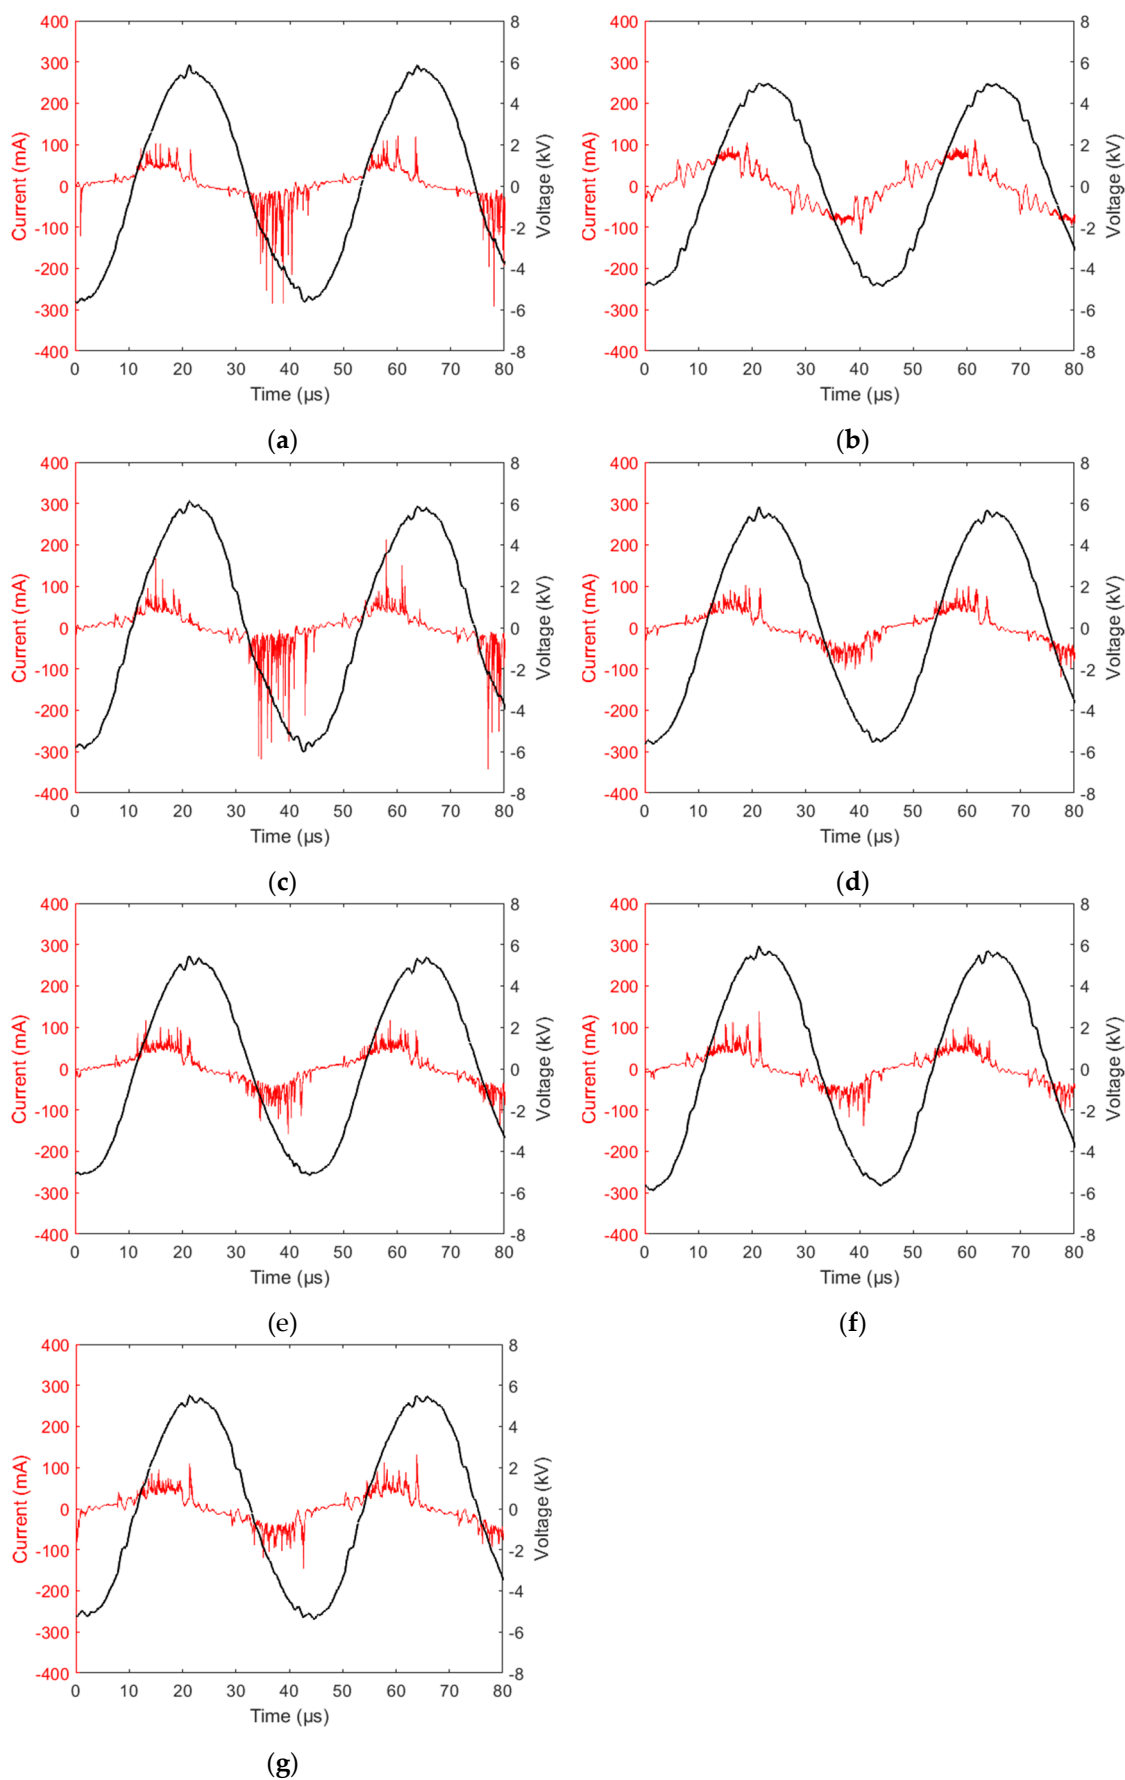

**Figure S3.** Current and voltage waveforms for the plasma-catalytic  $\text{NH}_3$  synthesis experiments with different  $\text{Al}_2\text{O}_3$ -supported catalysts and pristine  $\text{Al}_2\text{O}_3$ , at different  $\text{H}_2/\text{N}_2$  ratios in the feed gas. (a)  $\text{Al}_2\text{O}_3$  at the 1:1  $\text{H}_2/\text{N}_2$  gas ratio; (b) 10 wt%  $\text{Fe}/\text{Al}_2\text{O}_3$  at the 1:1  $\text{H}_2/\text{N}_2$  gas ratio; (c) 10 wt%  $\text{Ru}/\text{Al}_2\text{O}_3$  at the 1:1  $\text{H}_2/\text{N}_2$  gas ratio; (d) 10 wt%  $\text{Co}/\text{Al}_2\text{O}_3$  at the 1:1  $\text{H}_2/\text{N}_2$  gas ratio; (e) 10 wt%  $\text{Cu}/\text{Al}_2\text{O}_3$  at the 1:1  $\text{H}_2/\text{N}_2$  gas ratio; (f) 10 wt%  $\text{Co}/\text{Al}_2\text{O}_3$  at the 1:3  $\text{H}_2/\text{N}_2$  gas ratio; (g) 10 wt%  $\text{Co}/\text{Al}_2\text{O}_3$  at the 3:1  $\text{H}_2/\text{N}_2$  gas ratio.

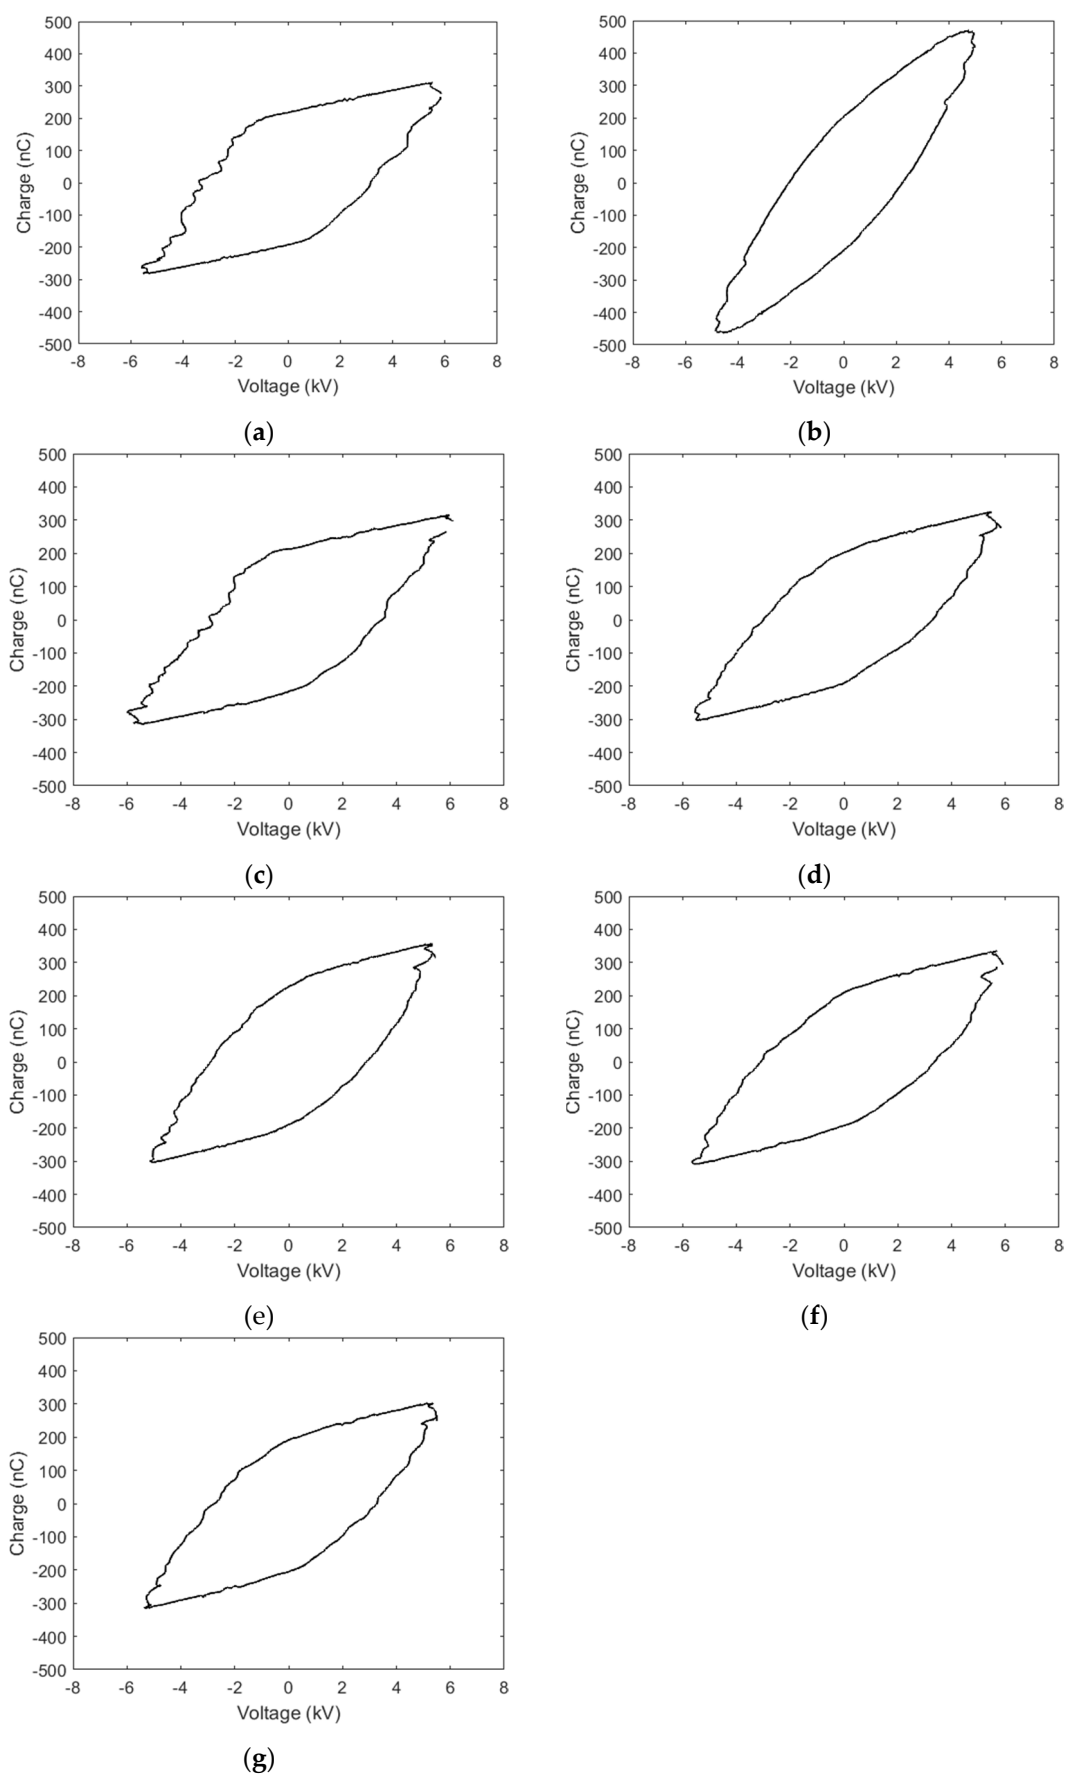

**Figure S4.** Lissajous figures for the plasma-catalytic  $\text{NH}_3$  synthesis experiments with different  $\text{Al}_2\text{O}_3$ -supported catalyst and pristine  $\text{Al}_2\text{O}_3$ , at the different  $\text{H}_2/\text{N}_2$  ratios in the feed gas. (a)  $\text{Al}_2\text{O}_3$  at the 1:1  $\text{H}_2/\text{N}_2$  gas ratio; (b) 10 wt%  $\text{Fe}/\text{Al}_2\text{O}_3$  at the 1:1  $\text{H}_2/\text{N}_2$  gas ratio; (c) 10 wt%  $\text{Ru}/\text{Al}_2\text{O}_3$  at the 1:1  $\text{H}_2/\text{N}_2$  gas ratio; (d) 10 wt%  $\text{Co}/\text{Al}_2\text{O}_3$  at the 1:1  $\text{H}_2/\text{N}_2$  gas ratio; (e) 10 wt%  $\text{Cu}/\text{Al}_2\text{O}_3$  at the 1:1  $\text{H}_2/\text{N}_2$  gas ratio; (f) 10 wt%  $\text{Co}/\text{Al}_2\text{O}_3$  at the 1:3  $\text{H}_2/\text{N}_2$  gas ratio; (g) 10 wt%  $\text{Co}/\text{Al}_2\text{O}_3$  at the 3:1  $\text{H}_2/\text{N}_2$  gas ratio.

**Table S2.** The amount of the used catalyst, and the production rate of  $\text{NH}_3$  (in  $\text{mg}/(\text{h} \times \text{g}_{\text{cat}})$ ) in our work compared to literature reports.

| Reference in the main text | Catalyst amount (g) | NH <sub>3</sub> production rate |                                   |
|----------------------------|---------------------|---------------------------------|-----------------------------------|
|                            |                     | mg/h                            | mg/(h $\times$ g <sub>cat</sub> ) |
| [35]                       | 17                  | 119                             | 6.9                               |
| [36]                       | 173                 | 32                              | 0.2                               |
| [39]                       | 3.6                 | 76                              | 21                                |
| [42]                       | 100                 | 17                              | 0.2                               |
| [46]                       | 0.5                 | 25                              | 50                                |
| this work                  | 12                  | 42                              | 3.5                               |
